# Supplementary material for: In situ confinement of ultra-small metal nanoparticles in redox-active zirconium MOFs for catalysis
Source: Royal Society of Chemistry journal article supplement (doi:10.1039/d4cc01976h), 2024-01-01
Supplement: d4cc01976h1.pdf [file d4cc01976h1.pdf]

**Electronic Supplementary Material (ESI) for ChemComm.**

## **In situ confinement of ultra-small metal nanoparticles in redox-active Zirconium MOFs for catalysis**

Fugang Li,<sup>a,†</sup> Jinyi Huang,<sup>a,†</sup> Yuxuan Meng,<sup>a</sup> Ji Li,<sup>b</sup> ,<sup>†</sup> Liangliang Zhang<sup>a,b,\*</sup> and Daopeng Sheng<sup>c,\*</sup>

<sup>†</sup> Fujian Cross Strait Institute of Flexible Electronics (Future Technologies), Fujian Normal University, Fuzhou 350117, China

<sup>§</sup> Institute of Flexible Electronics, Northwestern Polytechnical University (NPU), Xi'an 710072, China

<sup>||</sup> State Key Laboratory of Radiation Medicine and Protection, School for Radiological and Interdisciplinary Sciences (RAD-X) and Collaborative Innovation Center of Radiation Medicine of Jiangsu Higher Education Institutions, Soochow University, Suzhou, 215123, China

<sup>†</sup>These authors contributed equally.

---

Address correspondence to [ifellzhang@fjnu.edu.cn](mailto:ifellzhang@fjnu.edu.cn)

## 1. Synthesis of H<sub>4</sub>TCPA linker:

N,N,N',N'-tetrakis(4-carboxyphenyl)-1,4-phenylenediamine (H<sub>4</sub>TCPA) was synthesized according to the literature with some modifications<sup>[1,2]</sup>:

### 1.1. Synthesis of 4,4',4'',4'''-(1,4-phenylenebis(azanetriyl)) tetrabenzonitrile

A mixture of 2.80 g (0.04 mol) of sodium hydride and 100 mL of anhydrous DMF was stirred for about 0.5 h at room temperature. To this mixture, 1.08 g (0.01 mol) of p-phenylenediamine and 9.68 g (0.04 mol) of 4-fluorobenzonitrile were added in sequence. The mixture was heated with stirring at 120 °C for 30 h under nitrogen and then precipitated into 200 mL of cold water. The products were filtered and purified by flash chromatography to give pale yellowish solid 2.51 g (yield: 64 %). <sup>1</sup>H NMR (CDCl<sub>3</sub>): δ = 6.84 (s, 4H), 7.04 (d, 8H), 7.62 (d, 8H).

### 1.2. Synthesis of H<sub>4</sub>TCPA

3.92 g (0.01 mmol) of 4,4',4'',4'''-(1,4-phenylenebis(azanetriyl)) tetrabenzonitrile and 7.8 g of potassium hydroxide were mixed in a 100 mL CH<sub>3</sub>CH<sub>2</sub>OH/H<sub>2</sub>O (1:1) solution. The mixture was heated to reflux for 20 hours until no further ammonia was generated. The solution was cooled, and the pH value was adjusted by dilute hydrochloric acid to near 3. The yellowish precipitate formed was collected by filtration, washed thoroughly with water. Recrystallization from acetic acid gave pale yellow crystals 4.10 g. (yield: 87.6 %). <sup>1</sup>H NMR (300 MHz, *d*<sup>6</sup>-DMSO) δ = 7.08 (s, 4 H), 7.12 (d, 8 H), 7.95 (d, 8 H).

## 2. Synthesis of compounds 1 and 2

### 2.1 Synthesis of compound 1

ZrCl<sub>4</sub> (20 mg), H<sub>4</sub>TCPA (10 mg), and benzoic acid (400 mg) in 2 mL of DMF were ultrasonically dissolved in a 4 mL glass scintillation vial. The mixture was heated in an oven to 120 °C for 36 h. After cooling down to room temperature, light-yellow crystals were harvested by filtration (7 mg, 70% yield).

### 2.2 Synthesis of compound 2

ZrCl<sub>4</sub> (20 mg), H<sub>4</sub>TCPA (10 mg), and 0.1 mL TFA in 3 mL of DMF were ultrasonically dissolved in a 4 mL glass scintillation vial. The mixture was heated in an oven to 120 °C for 36 h. After cooling down to room temperature, yellow powders were harvested by filtration (6 mg, 70% yield).

### 2.3 Synthesis of Eu-mof

Eu(NO<sub>3</sub>)<sub>3</sub>·6H<sub>2</sub>O (5 mg), H<sub>4</sub>TCPA (1 mg), 2-fluorobenzoic acid (100 mg) were

dissolved into a mixture solution of DMF/H<sub>2</sub>O (V:V = 1:1, 1.1 mL) in a 10 mL vial, which was then sealed, heated in a preheated oven at 120 °C for 24 h. After cooling to room temperature, the colorless crystals were collected and washed with DMF.

### 3. Synthesis of Pd NPs@1 and Pd NPs@2

Typically, the prepared compound **1** were immersed in an acetonitrile solution of Pd(NO<sub>3</sub>)<sub>2</sub> ( $1.0 \times 10^{-3}$  M) for 12h at room temperature in the dark. The brown solid of Pd NPs@**1** resulted, which was filtered off, washed with fresh MeCN for three times to remove the metal salts, and dried in the air. Pd NPs@**2** were synthesized by a similar procedure, except that compound **2** was used.

#### 4. General Characterizations:

**Table S1.** Crystal data and structure refinements.

|                                                                         | Compound 1                                                                                                             | Eu-MOF                                                                                                                   |
|-------------------------------------------------------------------------|------------------------------------------------------------------------------------------------------------------------|--------------------------------------------------------------------------------------------------------------------------|
| CCDC                                                                    | 2294100                                                                                                                | 2359884                                                                                                                  |
| Formula                                                                 | Zr <sub>6</sub> C <sub>68</sub> H <sub>56</sub> N <sub>4</sub> O <sub>32</sub>                                         | Eu <sub>6</sub> C <sub>68.5</sub> H <sub>40</sub> F <sub>8</sub> N <sub>4</sub> O <sub>24.5</sub>                        |
| Compositions                                                            | Zr <sub>6</sub> (μ <sub>3</sub> -O) <sub>4</sub> (TCPA) <sub>2</sub> (OH) <sub>4</sub> (H <sub>2</sub> O) <sub>4</sub> | Eu <sub>6</sub> (μ <sub>3</sub> -F) <sub>8</sub> (TCPA) <sub>2</sub> (HCOO) <sub>4</sub> (H <sub>2</sub> O) <sub>4</sub> |
| Formula weight                                                          | 1972.36                                                                                                                | 2374.80                                                                                                                  |
| Color/Shape                                                             | colorless                                                                                                              | colorless                                                                                                                |
| Crystal system                                                          | Orthorhombic                                                                                                           | Orthorhombic                                                                                                             |
| Space group                                                             | <i>Fmmm</i>                                                                                                            | <i>Fmmm</i>                                                                                                              |
| <i>a</i> (Å)                                                            | 17.936 (2)                                                                                                             | 19.893 (3)                                                                                                               |
| <i>b</i> (Å)                                                            | 30.464 (4)                                                                                                             | 30.475 (4)                                                                                                               |
| <i>c</i> (Å)                                                            | 31.068 (4)                                                                                                             | 31.958 (5)                                                                                                               |
| <i>α</i> (°)                                                            | 90.00                                                                                                                  | 90.00                                                                                                                    |
| <i>β</i> (°)                                                            | 90.00                                                                                                                  | 90.00                                                                                                                    |
| <i>γ</i> (°)                                                            | 90.00                                                                                                                  | 90.00                                                                                                                    |
| <i>V</i> (Å <sup>3</sup> )                                              | 16975 (3)                                                                                                              | 19375 (5)                                                                                                                |
| <i>Z</i>                                                                | 4                                                                                                                      | 4                                                                                                                        |
| Wavelength (Å)                                                          | 0.71073 (MoK <sub>α</sub> )                                                                                            | 0.71073 (MoK <sub>α</sub> )                                                                                              |
| <i>d</i> <sub>calcd.</sub> (g/cm <sup>3</sup> )                         | 0.772                                                                                                                  | 0.814                                                                                                                    |
| <i>μ</i> (mm <sup>-1</sup> )                                            | 0.395                                                                                                                  | 1.951                                                                                                                    |
| <i>θ</i> <sub>max</sub> [deg]                                           | 23.4                                                                                                                   | 25.026                                                                                                                   |
| Completeness                                                            | 95.2 %                                                                                                                 | 99.6 %                                                                                                                   |
| Collected reflections                                                   | 42911                                                                                                                  | 98316                                                                                                                    |
| Unique reflections                                                      | 3183                                                                                                                   | 4599                                                                                                                     |
| Parameters                                                              | 135                                                                                                                    | 144                                                                                                                      |
| Restraints                                                              | 306                                                                                                                    | 330                                                                                                                      |
| <i>R</i> <sub>int</sub>                                                 | 0.454                                                                                                                  | 0.1105                                                                                                                   |
| <i>R</i> <sub>1</sub> (all data)                                        | 0.1931                                                                                                                 | 0.1842                                                                                                                   |
| <i>wR</i> <sub>2</sub> (all data)                                       | 0.3014                                                                                                                 | 0.3461                                                                                                                   |
| GOF on <i>F</i> <sup>2</sup>                                            | 1.053                                                                                                                  | 1.118                                                                                                                    |
| $\Delta\rho_{\max}/\Delta\rho_{\min}$ [e <sup>-</sup> Å <sup>-3</sup> ] | 1.23 / -1.08                                                                                                           | 3.50/-3.29                                                                                                               |

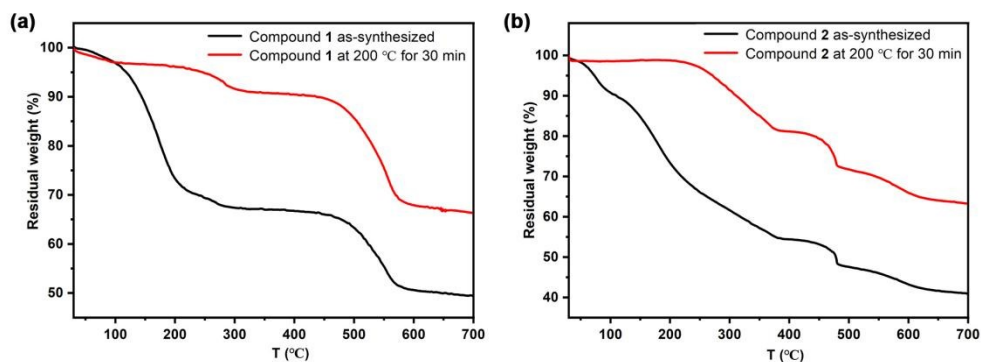

**Figure S1.** The TGA plots of compound 1 (a) and compound 2 (b).

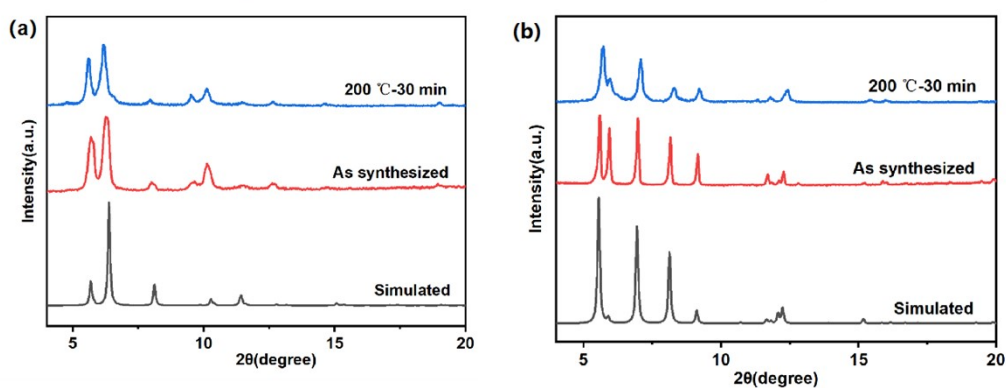

**Figure S2.** The PXRD patterns of compound 1 (a) and 2 (b) after heating at 200 °C for 30 min

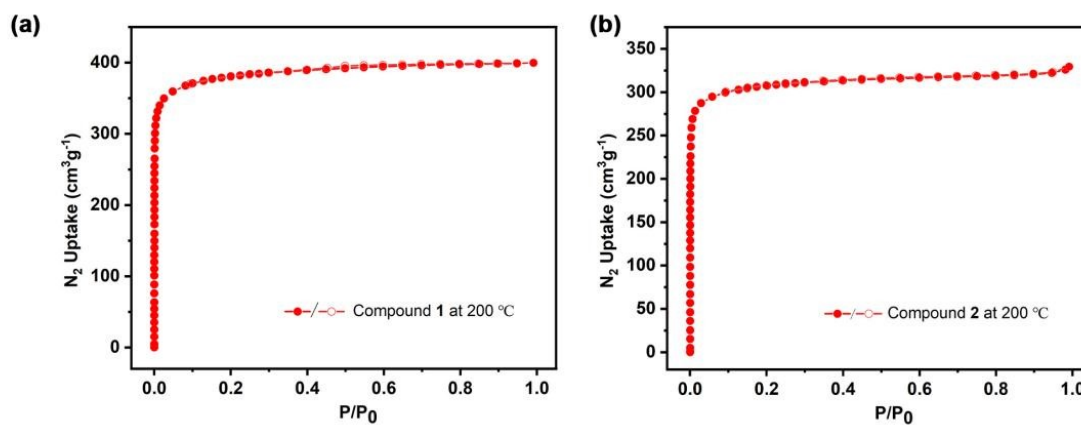

**Figure S3.** The N<sub>2</sub> adsorption-desorption isotherms of compound 1 (a) and 2 (b) after heating at 200 °C for 30 min

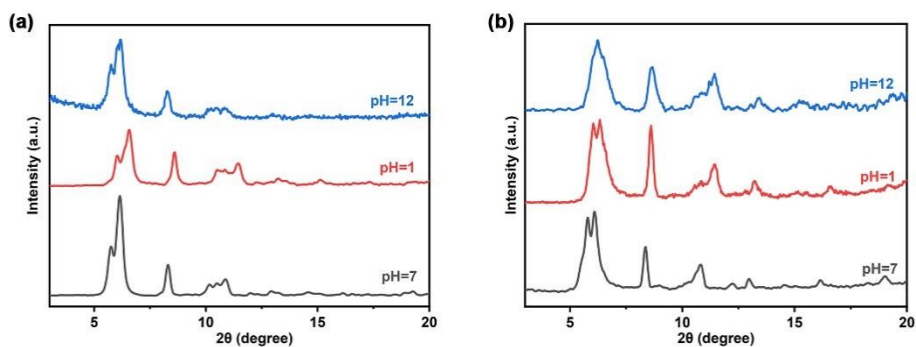

**Figure S4.** The chemical stabilities of compounds **1** (a) and **2** (b) were confirmed by comparing the PXRD patterns before and after immersion in aqueous solutions with various pH values for 24 h.

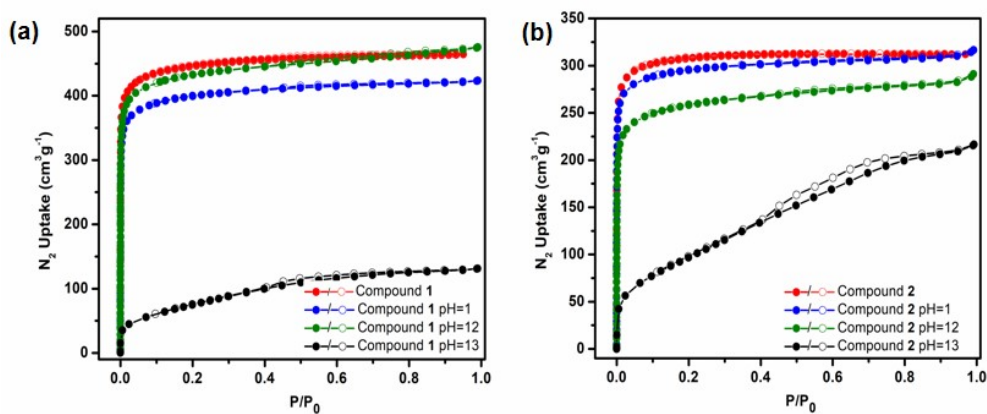

**Figure S5.** the  $N_2$  adsorption-desorption isotherms of compound **1** and **2** in aqueous solutions with various pH values for 24h

## 5. Redox Activity:

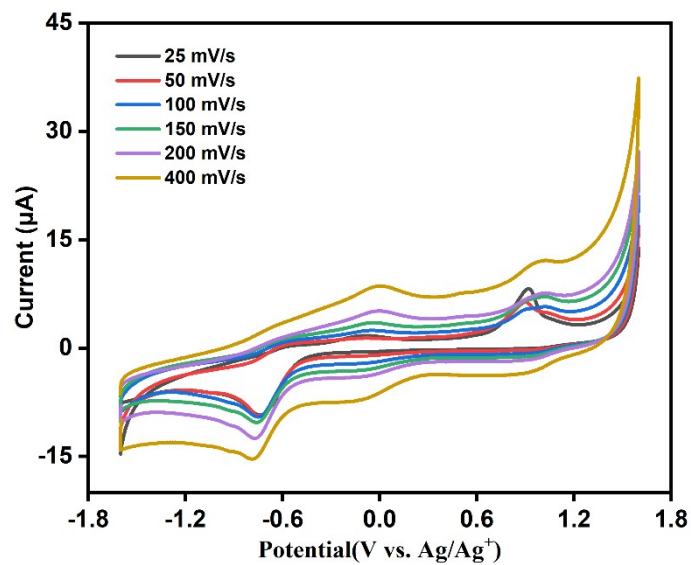

**Figure S6.** Solid state cyclic voltammogram of H<sub>4</sub>TCPA swept anodically at scan rates of 25-400 mV/s.

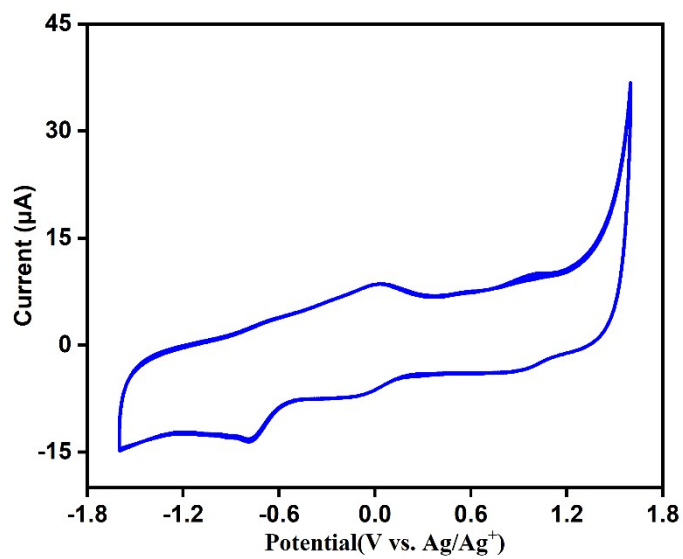

**Figure S7.** Solid state CV of H<sub>4</sub>TCPA upon cycling anodically at 400 mV/s three times.

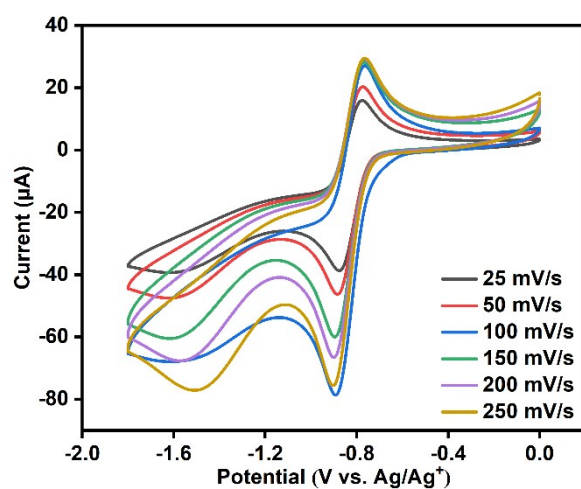

**Figure S8.** Solid state cyclic voltammogram of compound **1** swept anodically at scan rates of 25-250 mV/s.

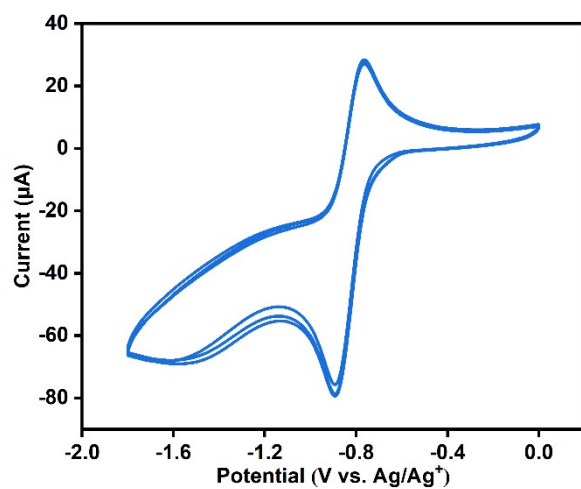

**Figure S9.** Solid state CV of compound **1** upon cycling anodically at 100 mV/s three times.



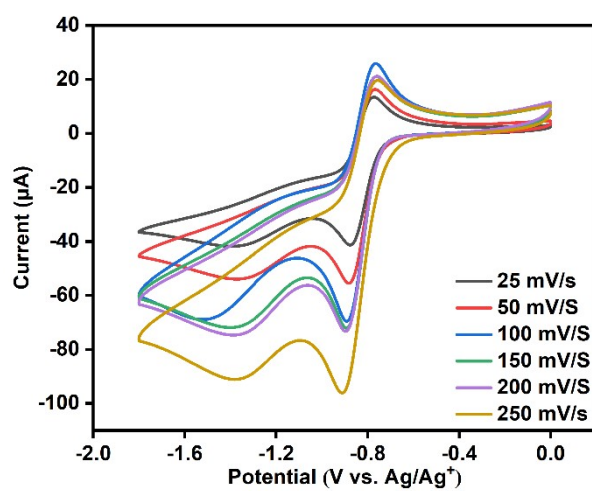

**Figure S10.** Solid state cyclic voltammogram of compound **2** swept anodically at scan rates of 25-250 mV/s.

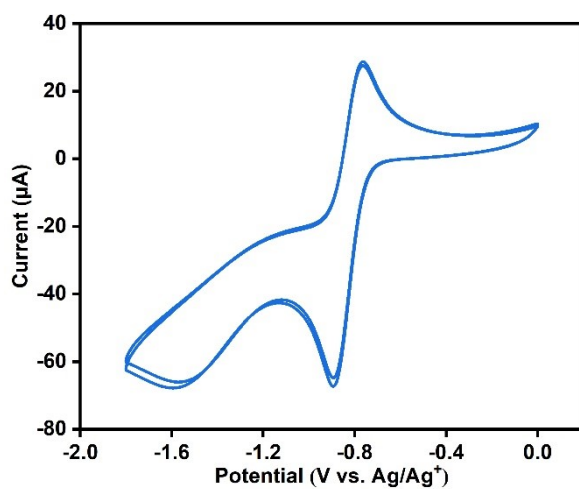

**Figure S11.** Solid state CV of compound **2** upon cycling anodically at 100 mV/s three times.

## 6. General Characterizations of Pd@MOFs:

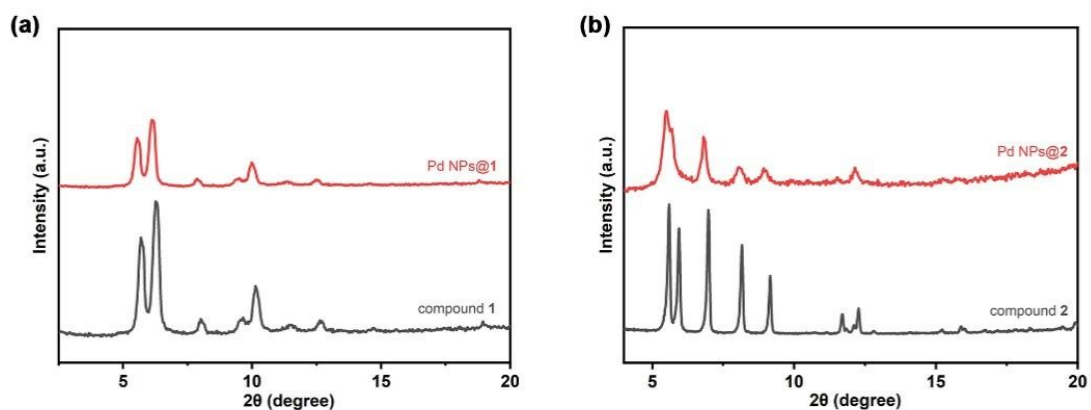

**Figure S12.** X-ray powder diffraction patterns for Pd NPs@1, compounds 1 (a) and Pd NPs@2, compounds 2 (b).

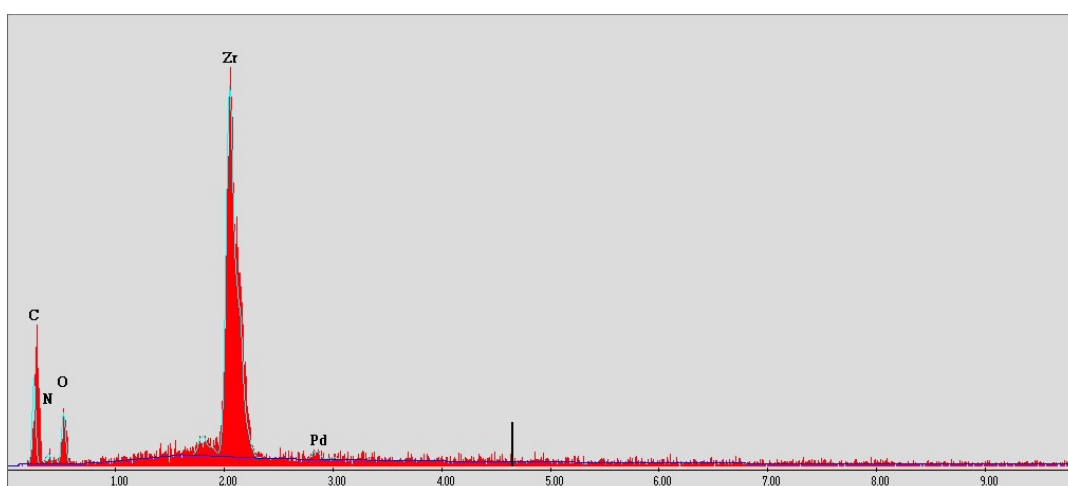

**Figure S13.** EDS of Pd NPs@1.

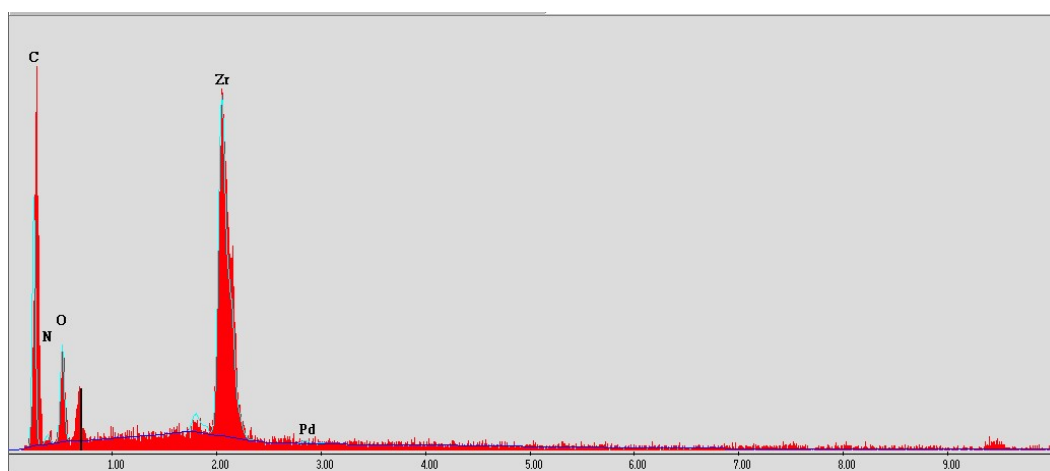

**Figure S14.** EDS of Pd NPs@2.

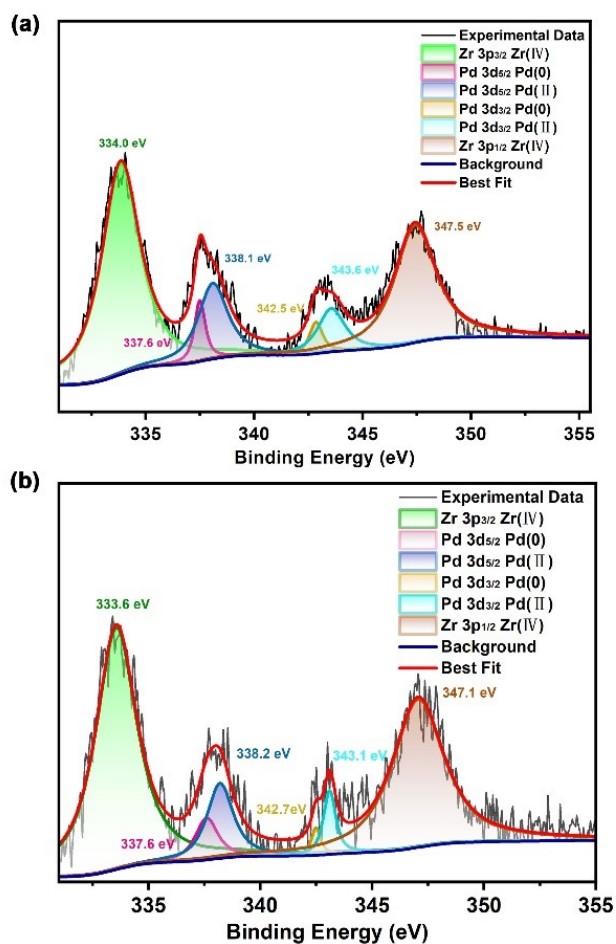

Figure S15. X-ray photoelectron spectra of Pd NPs@1 (a) and Pd NPs@2 (b).

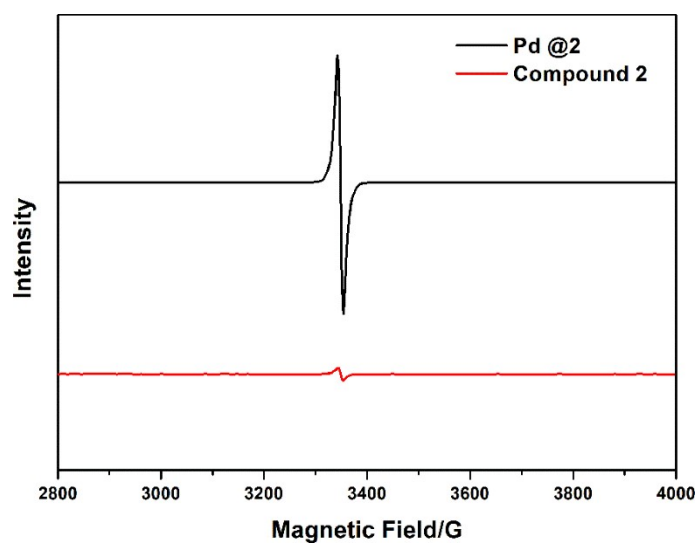

Figure S16. The solid state EPR spectra of compound 2 and Pd@2 at 110 K.

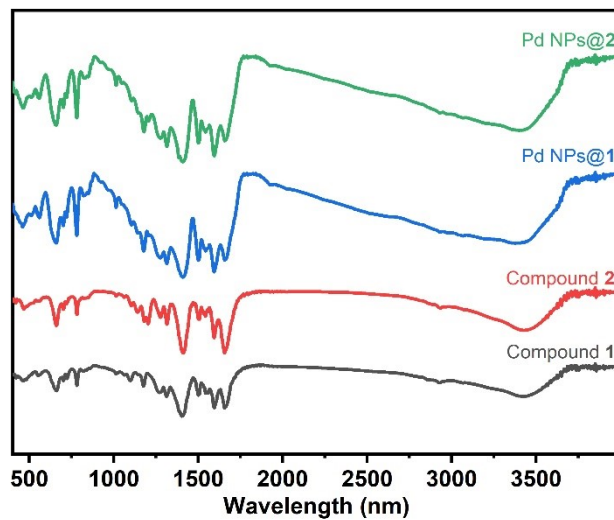

**Figure S17.** The IR spectra for compound 1, compound 2, Pd NPs@1, Pd NPs@2.

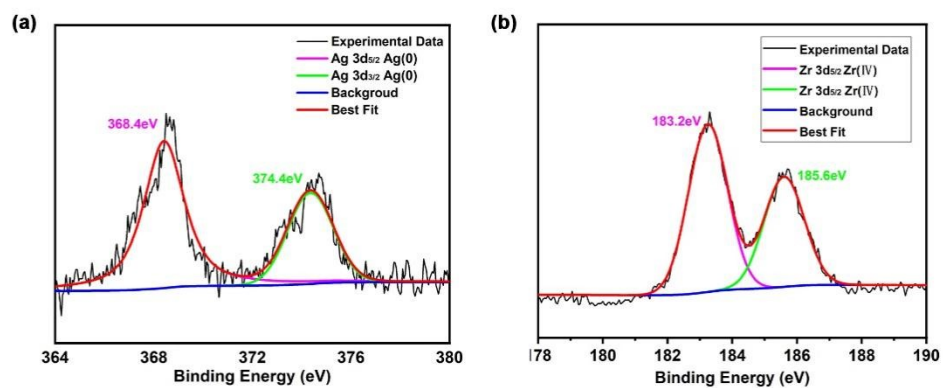

**Figure S18.** X-ray photoelectron spectra of Ag NPs@1.

## 7. Catalytic Activity:

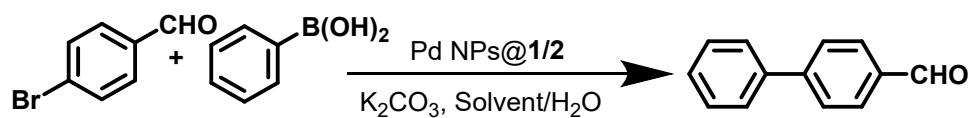

**Figure S19.** 4-bromobenzaldehyde (0.5 mmol), phenylboronic (0.6 mmol), K<sub>2</sub>CO<sub>3</sub> (1.0 mmol) Pd NPs@1/2(5.0 mg) in above organic solvents (2.0 mL) and H<sub>2</sub>O (0.5 mL) for 2 h at 100°C

**Table S2.** Screening conditions of Pd NPs@1 for the Suzuki-Miyaura coupling reaction.

| Entry | Solvent            | Time (h) | Conversion (%) |
|-------|--------------------|----------|----------------|
| 1     | DMF                | 2        | 99             |
| 2     | THF                | 2        | 54             |
| 3     | Toluene            | 2        | 48             |
| 4     | CH <sub>3</sub> CN | 2        | 91             |

**Table S3.** Screening conditions of Pd NPs@2 for the Suzuki-Miyaura coupling reaction

| Entry | Solvent            | Time (h) | Conversion (%) |
|-------|--------------------|----------|----------------|
| 1     | DMF                | 2        | 99             |
| 2     | THF                | 2        | 67             |
| 3     | Toluene            | 2        | 70             |
| 4     | CH <sub>3</sub> CN | 2        | 89             |

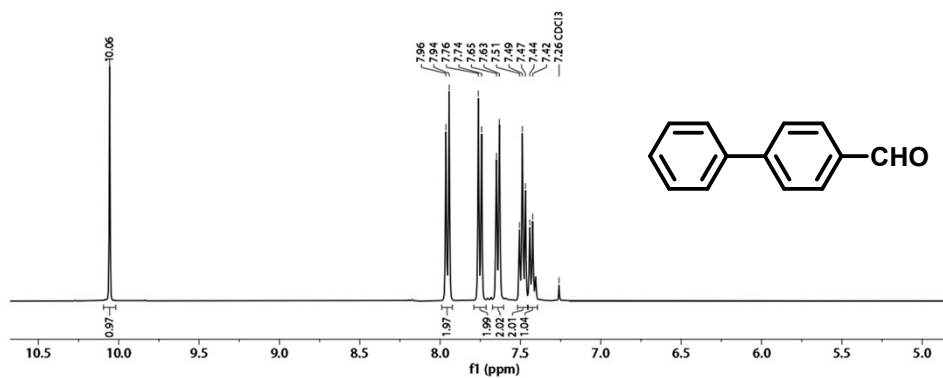

**Figure S20.**  $^1\text{H}$  NMR (400 MHz, Chloroform-d) of [1,1'-biphenyl]-4-carboxaldehyde:  $\delta$  10.06 (s, 1H), 7.95 (d,  $J = 8.3$  Hz, 2H), 7.75 (d,  $J = 8.3$  Hz, 2H), 7.64 (d,  $J = 7.0$  Hz, 2H), 7.49 (t,  $J = 7.4$  Hz, 2H), 7.43 (d,  $J = 7.2$  Hz, 1H).

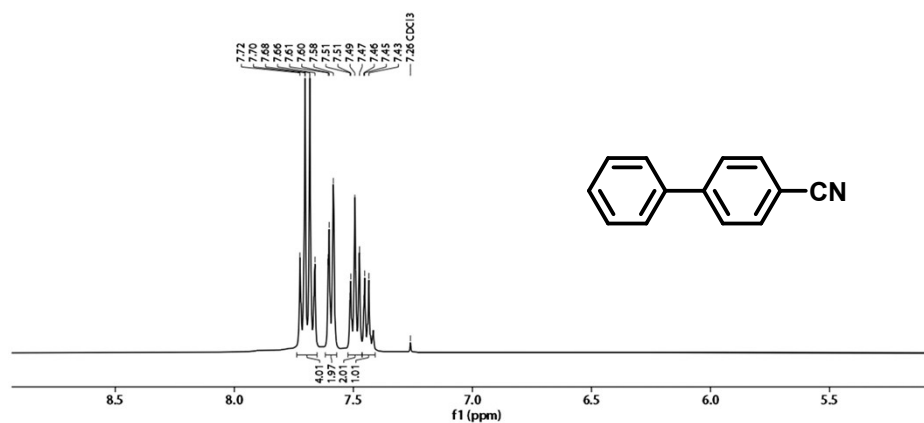

**Figure S21.**  $^1\text{H}$  NMR (400 MHz, Chloroform-d) of [1,1'-biphenyl]-4-carbonitrile:  $\delta$  7.69 (q,  $J = 8.7$  Hz, 4H), 7.62 – 7.57 (m, 2H), 7.49 (t,  $J = 7.3$  Hz, 2H), 7.46 – 7.41 (m, 1H).

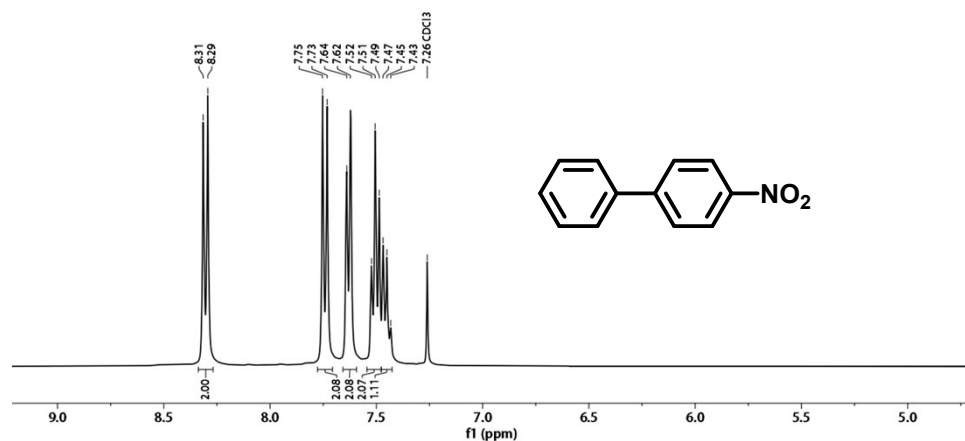

**Figure S22.**  $^1\text{H}$  NMR (400 MHz, Chloroform-d) of 4-nitro-1,1'-biphenyl:  $\delta$  8.30 (d,  $J$  = 8.8 Hz, 2H), 7.74 (d,  $J$  = 8.8 Hz, 2H), 7.63 (d,  $J$  = 6.6 Hz, 2H), 7.50 (t,  $J$  = 7.2 Hz, 2H), 7.45 (t,  $J$  = 7.2 Hz, 1H).

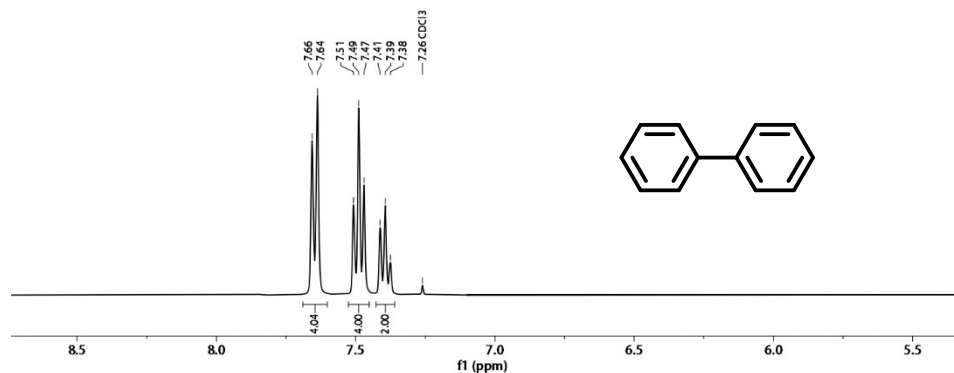

**Figure S23.**  $^1\text{H}$  NMR (400 MHz, Chloroform-d) of 1,1'-biphenyl:  $\delta$  7.65 (d,  $J$  = 7.6 Hz, 4H), 7.49 (qt,  $J$  = 10.1, 7.6, 0.0 Hz, 4H), 7.39 (t,  $J$  = 7.4 Hz, 2H).

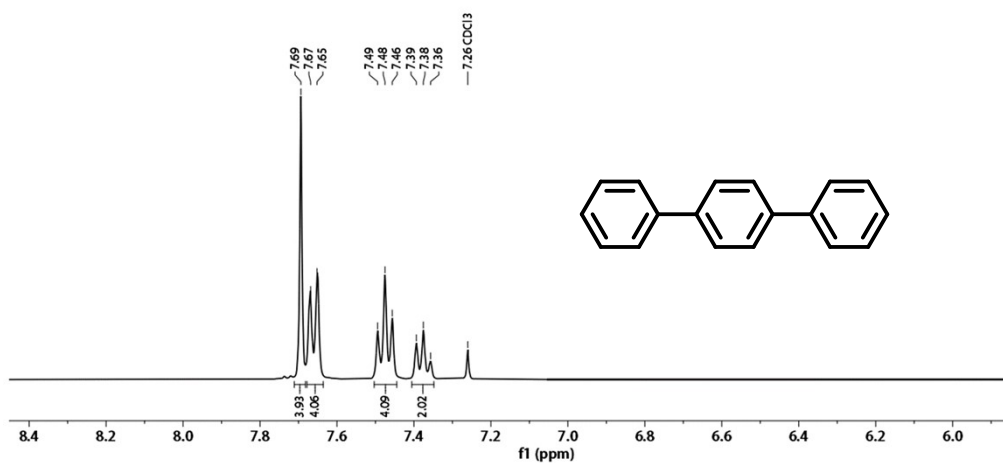

**Figure S24.**  $^1\text{H}$  NMR (400 MHz, Chloroform-d) of 1,1':4',1''-terphenyl:  $\delta$  7.69 (s, 4H), 7.66 (d,  $J$  = 6.7 Hz, 4H), 7.48 (t,  $J$  = 7.6 Hz, 4H), 7.38 (t,  $J$  = 7.4 Hz, 2H).

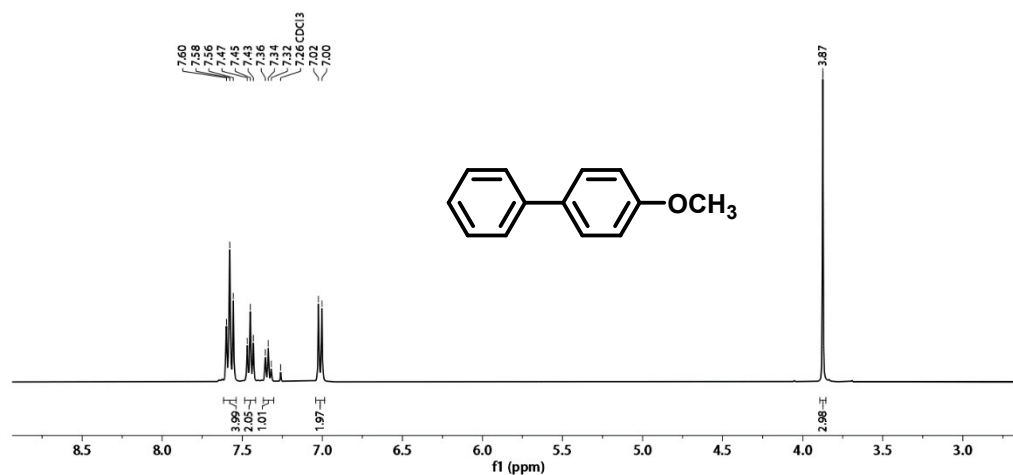

**Figure S25.**  $^1\text{H}$  NMR (400 MHz, Chloroform- $d$ ) of 4-methoxy-1,1'-biphenyl:  $\delta$  7.58 (t,  $J = 8.5$  Hz, 4H), 7.45 (t,  $J = 7.7$  Hz, 2H), 7.34 (t,  $J = 7.3$  Hz, 1H), 7.01 (d,  $J = 8.8$  Hz, 2H), 3.87 (s, 3H).

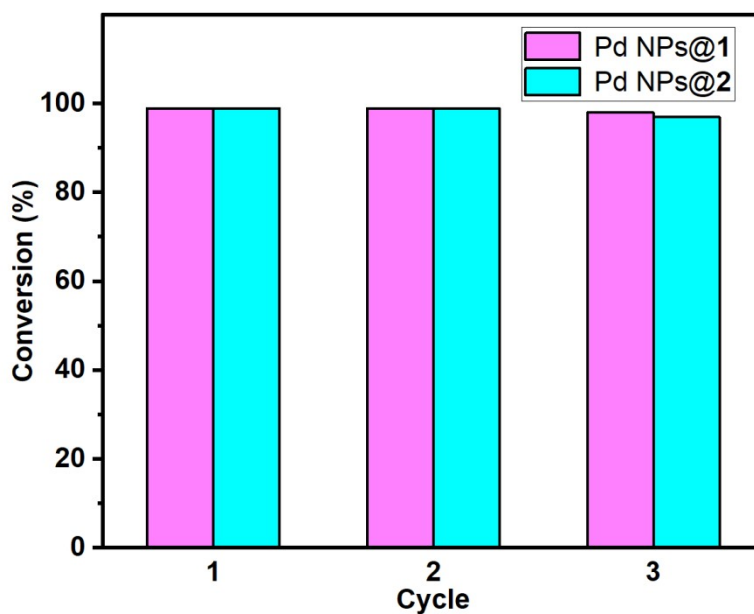

**Figure S26.** The yield of Suzuki-Miyaura coupling reaction product after three-time catalytic cycles using 4-bromobenzaldehyde as substrate.



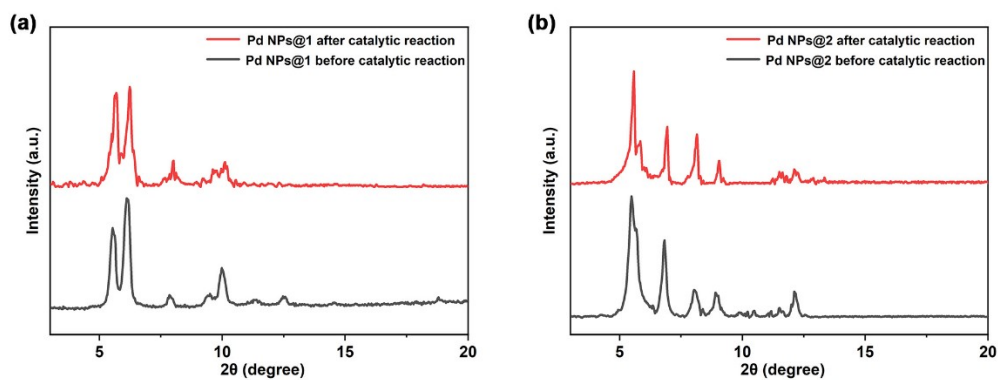

**Figure S27.** X-ray powder diffraction patterns for Pd NPs@1 (a) and Pd NPs@2 (b) before and after Suzuki-Miyaura coupling reactions using 4-bromobenzaldehyde as substrate.

## Reference

- [1] Sun D., Ke Y.; Mattox T. M., Ooro B. A., Zhou H. C., *Chem. Commun. (Camb.)*, 2005, 5447-5449.
- [2] Sun D., Collins D. J., Ke Y., Zuo J. L., Zhou H. C., *Chem. - Eur. J.*, 2006, 12, 3768-3776.
